# Supplementary material for: Neuroprognostication of Consciousness Recovery in a Patient with COVID-19 Related Encephalitis: Preliminary Findings from a Multimodal Approach
Source: PubMed Central journal article supplement (PMC7696159; doi:10.3390/brainsci10110845), 2020-11-12
Supplement: brainsci-10-00845-s001.pdf [file brainsci-10-00845-s001.pdf]

# CoCo-Neurosciences Study Group

## List of Affiliations for Publications

**Steering Committee** (Pitié-Salpêtrière Hospital, Paris): Cecile Delorme, Jean-Christophe Corvol, Jean-Yves Delattre, Stephanie Carvalho, Sandrine Sagnes. **Scientific Committee** (Pitié-Salpêtrière Hospital, Paris): Bruno Dubois, Vincent Navarro, Celine Louapre, Tanya Stojkovic, Ahmed Idhah, Charlotte Rosso, David Grabli, Ana Zenovia Gales, Bruno Millet, Benjamin Rohaut, Eleonore Bayen, Sophie Dupont, Gaelle Bruneteau, Stephane Lehericy, Danielle Seilhean, Alexandra Durr, Aurelie Kas, Foudil Lamari, Marion Houot, Vanessa Batista Brochard. **Principal investigators:** Pitié-Salpêtrière Hospital (Paris): Sophie Dupont, Catherine Lubetzki, Danielle Seilhean, Pascale Pradat-Diehl, Charlotte Rosso, Khe Hoang-Xuan, Bertrand Fontaine, Lionel Naccache, Philippe Fossati, Isabelle Arnulf, Alexandra Durr, Alexandre Carpentier, Stephane Lehericy, Yves Edel; Foch Hospital (Suresnes): Anna Luisa Di Stefano; Rothschild Hospital (Paris): Gilberte Robain, Philippe Thoumie; Avicenne Hospital (Bobigny): Bertrand Degos; Sainte-Anne Hospital (Paris): Tarek Sharshar; Saint-Antoine Hospital (Paris): Sonia Alamowitch, Emmanuelle Apartis-Bourdieu, Charles-Siegfried Peretti; Saint-Louis Hospital (Paris): Renata Ursu; Tenon Hospital (Paris): Nathalie Dzierzynski; Charles Foix Hospital (Ivry): Kiyoka Kinugawa Bourron, Joel Belmin, Bruno Oquendo, Eric Pautas, Marc Verny. **Co-investigators:** Pitié-Salpêtrière Hospital (Paris): Cecile Delorme, Jean-Christophe Corvol, Jean-Yves Delattre, Yves Samson, Sara Leder, Anne Leger, Sandrine Deltour, Flore Baronnet, Ana Zenovia Gales, Stephanie Bombois, Mehdi Touat, Ahmed Idhah, Marc Sanson, Caroline Dehais, Caroline Houillier, Florence Laigle-Donadey, Dimitri Psimaras, Agusti Alenton, Nadia Younan, Nicolas Villain, David Grabli, Maria del Mar Amador, Gaelle Bruneteau, Celine Louapre, Louise-Laure Mariani, Nicolas Mezouar, Graziella Mangone, Aurelie Meneret, Andreas Hartmann, Clement Tarrano, David Bendetowicz, Pierre-François Pradat, Michel Baulac, Sara Sambin, François Salachas, Nadine Le Forestier, Phintip Pichit, Florence Chochon, Adele Hesters, Bastien Herlin, An Hung Nguyen, Valerie Procher, Alexandre Demoule, Elise Morawiec, Julien Mayaux, Morgan Faure, Claire Ewencyk, Giulia Coarelli, Anna Heinzmann, Perrine Charles, Tanya Stojkovic, Marion Masingue, Guillaume Bassez, Giorgia Querin, Vincent Navarro, Isabelle An, Yulia Worbe, Virginie Lambrecq, Rabab Debs, Esteban Munoz Musat, Timothee Lenglet, Virginie Lambrecq, Aurelie Hanin, Lydia Chougar, Nathalia Shor, Nadya Pyatigorskaya, Damien Galanaud, Delphine Leclercq, Sophie Demeret, Benjamin Rohaut, Albert Cao, Clemence Marois, Nicolas Weiss, Salimata Gassama, Loic Le Guennec, Vincent Degos, Alice Jacquens, Thomas Similowski, Capucine Morelot-Panzini, Jean-Yves Rotge, Bertrand Saudreau, Bruno Millet, Victor Pitron, Nassim Sarni, Nathalie Girault, Redwan Maatoug, Ana Zenovia Gales, Smaranda Leu, Eleonore Bayen, Lionel Thivard, Karima Mokhtari, Isabelle Plu; Sainte-Anne Hospital (Paris): Bruno Gonçalves; Saint-Antoine Hospital (Paris): Laure Bottin, Marion Yger; Rothschild Hospital (Paris): Gaelle Ouvrard, Rebecca Haddad; Charles Foix Hospital (Ivry): Flora Ketz, Carmelo Lafuente, Christel Oasi. **Other Contributors:** **Associated centers** (Lariboisière Hospital, Paris): Bruno Megabarne, Dominique Herve; **Clinical Research Associates** (ICM, Pitié-Salpêtrière Hospital, Paris): Haysam Salman, Armelle Rametti-Lacroux, Alize Chalançon, Anais Herve, Hugo Royer, Florence Beuzor, Valentine Maheo, Christelle Laganot, Camille Minelli, Aurelie Fekete, Abel Grine, Marie Biet, Rania Hilab, Aurore Besnard, Meriem Bouguerra, Gwen Goudard, Saida Houairi, Saba Al-Youssef, Christine Pires, Anissa Oukhedouma, Katarzyna Siuda-Krzywicka, Tal Seidel Malkinson; (Saint-Louis Hospital, Paris): Hanane Agguini; (Foch Hospital, Suresnes): Hassen Douzane; **Data Manager** (ICM, Paris): Safia Said; **Statistician** (ICM, Paris): Marion Houot.
